# Supplementary material
Source: ML conference proceedings conference paper supplement (https://proceedings.neurips.cc/paper_files/paper/2020/hash/a512294422de868f8474d22344636f16-Abstract.html)
Supplement: Supplementary file [file a512294422de868f8474d22344636f16-Supplemental.pdf]

## A Proofs

### A.1 Preliminaries: Online optimization with time-dependent regularization

We give a brief background on Follow the Regularized Leader and Online Mirror Descent algorithmic templates, in the case where the regularization is varying and time-dependent.

The setup is the standard setup of online linear optimization. Let  $\mathcal{W} \subseteq \mathbb{R}^d$  be a convex domain. On each prediction round  $t = 1, \dots, T$ , the learner has to produce a prediction  $w_t \in \mathbb{R}^d$  based on  $g_1, \dots, g_{t-1}$ , and subsequently observes a new loss vector  $g_t$  and incurs the loss  $w_t \cdot g_t$ . The goal is to minimize the regret compared to any  $w^* \in \mathcal{W}$ , given by  $\sum_{t=1}^T g_t \cdot (w_t - w^*)$ .

**Follow the Regularized Leader (FTRL).** The FTRL template generates predictions  $w_1, \dots, w_T \in \mathcal{W}$ , for  $t = 1, \dots, T$ , as follows:

$$w_t = \operatorname{argmin}_{w \in \mathcal{W}} \left\{ w \cdot \sum_{s=1}^{t-1} g_s + R_t(w) \right\}. \quad (6)$$

Here,  $R_1, \dots, R_T : \mathcal{W} \rightarrow \mathbb{R}$  is a sequence of twice-differentiable, strictly convex functions.

The derivation and analysis of FTRL-type algorithms is standard; see, e.g., [29, 13, 25]. In our analysis, however, we require a particular regret bound that we could not find stated explicitly in the literature (similar bounds exist, however, and date back at least to [7]). For completeness, we provide the bound here with a proof in the full version of the paper [?].

**Theorem 10.** *Suppose that  $R_t = \eta_t^{-1} R$  for all  $t$  for some strictly convex  $R$ , with  $\eta_1 \geq \dots \geq \eta_T > 0$ . Then there exists a sequence of points  $z_t \in [w_t, w_{t+1}]$  such that the following regret bound holds for all  $w^* \in \mathcal{W}$ :*

$$\sum_{t=1}^T g_t \cdot (w_t - w^*) \leq \frac{1}{\eta_1} (R(w^*) - R(w_1)) + \sum_{t=1}^T \left( \frac{1}{\eta_{t+1}} - \frac{1}{\eta_t} \right) (R(w^*) - R(w_{t+1})) + \frac{1}{2} \sum_{t=1}^T \eta_t (\|g_t\|_t^*)^2,$$

where  $\|g\|_t^2 = g^\top \nabla^2 R(z_t) g$  is the local norm induced by  $R$  at an appropriate  $z_t \in [w_t, w_{t+1}]$ , and  $\|\cdot\|_t^*$  is its dual norm.

**Online Mirror Descent (OMD).** The closely-related OMD framework produces predictions  $w_1, \dots, w_T$  via the following procedure: initialize  $w_1 = \operatorname{argmin}_{w \in \mathcal{W}} R_1(w)$ , and for  $t = 1, \dots, T$ , compute

$$\begin{aligned} w'_{t+1} &= \operatorname{argmin}_w \{ g_t \cdot w + D_{R_t}(w, w_t) \} = (\nabla R_t)^{-1} (\nabla R_t(w_t) - g_t); \\ w_{t+1} &= \operatorname{argmin}_{w \in \mathcal{W}} D_{R_t}(w, w'_{t+1}). \end{aligned} \quad (7)$$

Here,  $R_1, \dots, R_T : \mathcal{W} \rightarrow \mathbb{R}$  is a sequence of twice-differentiable, strictly convex functions and  $D_R(w', w) = R(w') - R(w) - \nabla R(w) \cdot (w' - w)$  is the Bregman divergence of a convex function  $R$  at point  $w \in \mathcal{W}$ .

The proof of the following regret bound (which is again a somewhat specialized variant of standard bounds for OMD) appears in the full version of the paper [?].

**Theorem 11.** *Suppose that  $R_t = \eta_t^{-1} R$  for all  $t$  for some strictly convex  $R$ , with  $\eta_1 \geq \dots \geq \eta_T > 0$ . Then there exists a sequence of points  $z_t \in [w_t, w'_{t+1}]$  such that the following regret bound holds for all  $w^* \in \mathcal{W}$ :*

$$\sum_{t=1}^T g_t \cdot (w_t - w^*) \leq \frac{1}{\eta_1} (R(w^*) - R(w_1)) + \sum_{t=1}^{T-1} \left( \frac{1}{\eta_{t+1}} - \frac{1}{\eta_t} \right) D_R(w^*, w_{t+1}) + \frac{1}{2} \sum_{t=1}^T \eta_t (\|g_t\|_t^*)^2,$$

where  $\|\cdot\|_t$  is the local norm induced by  $R$  at an appropriate  $z_t \in [w_t, w'_{t+1}]$ , and  $\|\cdot\|_t^*$  is its dual.

### A.2 Upper bounds for FTRL

**Proof of Lemma 6.** We observe that Eq. (4) is an instantiation of FTRL with  $R_t(p) = \eta_t^{-1} R(p)$  as regularizations, where  $R(p) = -H(p) = \sum_{i=1}^N p_i \log p_i$  is the negative entropy. Hence, we can invoke

Theorem 10 to bound the regret compared to any probability distribution  $p^*$ . It suffices to bound the regret for  $p^*$  that minimizes  $\sum_{t=1}^T p \cdot \ell_t$ , which is always a point-mass on a single expert  $i^*$ , for which  $R(p^*) = 0$ . Therefore, Theorem 10 in our case reads

$$\sum_{t=1}^T \sum_{i=1}^N p_{t,i} (g_{t,i} - g_{t,i^*}) \leq -\frac{1}{\eta_1} R(p_1) - \sum_{t=1}^T \left( \frac{1}{\eta_{t+1}} - \frac{1}{\eta_t} \right) R(p_{t+1}) + \frac{1}{2} \sum_{t=1}^T \eta_t (\|g_t\|_{i^*}^2).$$

Now set  $\eta_t = \sqrt{\log(N)/t}$ . For the first two terms in the bound, observe that  $R(p_1) = -\log N$ , and further, that

$$\frac{1}{\eta_{t+1}} - \frac{1}{\eta_t} = \frac{1}{\sqrt{\log N}} \frac{1}{\sqrt{t+1}} - \frac{1}{\sqrt{\log N}} \frac{1}{\sqrt{t}} \leq \frac{1}{2\sqrt{t \log N}} = \frac{\eta_t}{2 \log N}. \quad (8)$$

For the final sum, we have to evaluate the Hessian  $\nabla^2 R(p'_t)$  at a point  $p'_t \in [p_t, p_{t+1}]$ . A straightforward differentiation shows that this matrix is diagonal, with diagonal elements  $\nabla^2 R(p'_t)_{ii} = 1/p'_{t,i}$ . Thus,

$$(\|g_t\|_{i^*}^2) = g_t^\top (\nabla^2 R(p'_t))^{-1} g_t = p'_t \cdot g_t^2. \quad (9)$$

The final sum can be divided and bounded as follows

$$\begin{aligned} \sum_{t=1}^T \eta_t (p'_t \cdot g_t^2) &= \sum_{t=1}^{4 \log N} \eta_t (p'_t \cdot g_t^2) + \sum_{t=1+4 \log N}^T \eta_t (p'_t \cdot g_t^2) \\ &\leq 4 \log N + \sum_{t=1+\log N}^T \eta_t (p'_t \cdot g_t^2). \end{aligned}$$

Where we used the fact that  $\sum_{s=1}^t \eta_s = \sum_{s=1}^t \sqrt{\log(N)/s} \leq 2\sqrt{t \log N}$ . To conclude the proof it suffices to show that  $p'_{t,i} \leq 9p_{t,i}$  for  $t \geq 4 \log N$ . To see this, denote  $G_t = \sum_{s=1}^{t-1} g_s$  and write

$$\frac{e^{-\eta_{t+1} G_{t+1,i}}}{e^{-\eta_t G_{t,i}}} = e^{-\eta_{t+1} g_{t,i}} e^{(\eta_t - \eta_{t+1}) G_{t,i}}.$$

For  $t \geq 4 \log N$ , the following relations hold:

$$\begin{aligned} 0 < \eta_{t+1} |g_{t,i}| &\leq \eta_{t+1} \leq \frac{1}{2}; \\ 0 < (\eta_t - \eta_{t+1}) |G_{t,i}| &\leq \sqrt{\log N} \frac{\sqrt{t+1} - \sqrt{t}}{\sqrt{t(t+1)}} t \leq \frac{\sqrt{\log N}}{\sqrt{t+1}} \leq \eta_t \leq \frac{1}{2}. \end{aligned}$$

Hence, for  $t \geq 4 \log N$  we have

$$\frac{1}{3} \leq \frac{e^{-\eta_{t+1} G_{t+1,i}}}{e^{-\eta_t G_{t,i}}} \leq 3,$$

and consequently

$$p_{t+1,i} = \frac{e^{-\eta_{t+1} G_{t+1,i}}}{\sum_{j=1}^N e^{-\eta_{t+1} G_{t+1,j}}} \leq 9 \frac{e^{-\eta_t G_{t,i}}}{\sum_{j=1}^N e^{-\eta_t G_{t,j}}} = 9p_{t,i}.$$

Since  $p'_t \in [p_t, p_{t+1}]$ , the same inequality holds for  $p'_t$ ; that is,  $p'_{t,i} \leq 9p_{t,i}$  for all  $i$ , and the proof is complete.  $\blacksquare$

**Lemma 12.** For the adaptive MW algorithm in Eq. (4) with loss vectors  $g_t = \tilde{\ell}_{t,i}$ , we have

$$\sum_{t=1}^T \eta_t \sum_{i=1}^N p_{t,i} (\tilde{\ell}_{t,i} - \tilde{\ell}_{t,i^*})^2 \leq \frac{16 \log N}{\Delta} + \frac{1}{8} \bar{\mathcal{R}}_T.$$

**Proof.** By setting  $t_0 = 64\Delta^{-2} \log N$  and  $\eta_t = \sqrt{\log(N)/t}$  we obtain

$$\begin{aligned} \sum_{t=1}^T \eta_t \sum_{i=1}^N p_{t,i} (\tilde{\ell}_{t,i} - \tilde{\ell}_{t,i^*})^2 &\leq \sum_{t=1}^{t_0} \eta_t + \sum_{t=t_0+1}^T \eta_{t_0} \sum_{i=1}^N p_{t,i} (\tilde{\ell}_{t,i} - \tilde{\ell}_{t,i^*})^2 \\ &\leq 2\sqrt{\log(N)}\sqrt{t_0} + \frac{\Delta}{8} \sum_{t=t_0+1}^T \sum_{i=1}^N p_{t,i} (\tilde{\ell}_{t,i} - \tilde{\ell}_{t,i^*})^2 \\ &\leq \frac{16 \log N}{\Delta} + \frac{1}{8} \sum_{t=t_0+1}^T \sum_{i=1}^N p_{t,i} (\mu_i - \mu_{i^*}), \end{aligned}$$

where in the final inequality we used observation 3. To conclude we note that  $p_{t,i}(\mu_i - \mu_{i^*}) \geq 0$ , thus we can modify the last summation to range over  $t = 1, \dots, T$ . ■

**Lemma 13.** For the adaptive MW algorithm in Eq. (4), we have

$$\frac{1}{\log N} \sum_{t=1}^T \eta_t H(p_{t+1}) \leq \frac{50 \log N}{\Delta} + \frac{5}{8} \overline{\mathcal{R}}_T.$$

**Proof.** First we split the sum as follows,

$$\frac{1}{\log N} \sum_{t=1}^T \eta_t H(p_{t+1}) = \frac{1}{\log N} \sum_{t=1}^{t_0} \eta_t H(p_{t+1}) + \frac{1}{\log N} \sum_{t=t_0+1}^T \eta_t H(p_{t+1}),$$

where  $t_0 = 64\Delta^{-2} \log N$ . For the summation of  $t = \{t_0 + 1, \dots, T\}$  we use Lemma 7 with  $\tau = t \log N \geq t_0 \log N = 64\Delta^{-2} \log^2 N$  to obtain

$$\begin{aligned} \frac{1}{\log N} \sum_{t=t_0+1}^T \eta_t H(p_{t+1}) &= \sum_{t=t_0+1}^T \frac{1}{\sqrt{t \log N}} \sum_{i=1}^N p_{t+1,i} \log \frac{1}{p_{t+1,i}} \\ &\leq \frac{5}{8} \sum_{t=t_0+1}^T \sum_{i \neq i^*} p_{t+1,i} \Delta + 2 \sum_{t=t_0+1}^T \frac{1}{\sqrt{t \log N}} e^{-\frac{1}{8}\Delta\sqrt{t \log N}} \\ &\leq \frac{5}{8} \sum_{t=t_0+1}^T \sum_{i=1}^N p_{t,i} (\mu_i - \mu_{i^*}) + \Delta + 2 \sum_{t=t_0+1}^T \frac{1}{\sqrt{t \log N}} e^{-\frac{1}{8}\Delta\sqrt{t \log N}}, \end{aligned}$$

where the last inequality follows for reordering terms in the summation and that  $\Delta \leq \mu_i - \mu_{i^*}$  for  $i \neq i^*$ . Using the fact that  $p_{t,i}(\mu_i - \mu_{i^*}) \geq 0$  we get

$$\frac{1}{\log N} \sum_{t=t_0+1}^T \eta_t H(p_{t+1}) \leq \frac{5}{8} \sum_{t=1}^T \sum_{i=1}^N p_{t,i} (\mu_i - \mu_{i^*}) + \Delta + 2 \sum_{t=t_0+1}^T \frac{1}{\sqrt{t \log N}} e^{-\frac{1}{8}\Delta\sqrt{t \log N}}. \quad (10)$$

Moreover, we have

$$\begin{aligned} \sum_{t=t_0+1}^T \frac{1}{\sqrt{t \log N}} e^{-\frac{1}{8}\Delta\sqrt{t \log N}} &\leq \frac{1}{\sqrt{\log N}} \int_{t_0}^T \frac{1}{\sqrt{t}} e^{-\frac{1}{8}\Delta\sqrt{\log N}\sqrt{t}} dt \\ &= \frac{1}{\sqrt{\log N}} \cdot \frac{16}{\Delta\sqrt{\log N}} e^{-\frac{1}{8}\Delta\sqrt{\log N}\sqrt{t}} \Big|_{t_0}^{t_0} \\ &\leq \frac{16}{\Delta \log N} \\ &\leq \frac{16}{\Delta}. \end{aligned} \quad (11)$$

Lastly, for the summation of  $t = \{1, \dots, t_0\}$  we get

$$\frac{1}{\log N} \sum_{t=1}^{t_0} \eta_t H(p_{t+1}) \leq 2\sqrt{t_0 \log N} = \frac{16 \log N}{\Delta} \quad (12)$$

which follows from  $H(p) \leq \log N$  and  $\sum_{t=1}^{t_0} 1/\sqrt{t} \leq 2\sqrt{t_0}$ . Combining Eqs. (10) to (12), the proof is concluded. ■

### A.3 Lower bound for OMD

**Proof of Theorem 9.** Let  $q_t$  denote the probability that MW-OMD chooses the best expert (i.e., expert #1) on round  $t$ . For  $t \leq C$ , the best expert suffers higher losses than the other expert, thus  $\mathbf{E}[q_t] \leq 1/2$ . For  $t > C$ , it holds that

$$q_t = \frac{e^{-\sum_{s=1}^{t-1} \eta_s (\bar{\ell}_{s,1} - \bar{\ell}_{s,2})}}{1 + e^{-\sum_{s=1}^{t-1} \eta_s (\bar{\ell}_{s,1} - \bar{\ell}_{s,2})}} \leq e^{-\sum_{s=1}^{t-1} \eta_s (\bar{\ell}_{s,1} - \bar{\ell}_{s,2})} = e^{-\sum_{s=1}^C \eta_s} \exp\left(\sum_{s=C+1}^{t-1} \eta_s (\ell_{s,2} - \ell_{s,1})\right).$$

Now, observe that

$$\sum_{s=1}^C \eta_s \geq C\eta_C = \alpha\sqrt{C}.$$

Also, by a standard application of Hoeffding's lemma (e.g., Appendix A of [3]),

$$\begin{aligned} \mathbf{E} \exp\left(\sum_{s=C+1}^{t-1} \eta_s (\ell_{s,2} - \ell_{s,1})\right) &= \prod_{s=C+1}^{t-1} \mathbf{E} e^{\eta_s (\ell_{s,2} - \ell_{s,1})} \\ &\leq \prod_{s=C+1}^{t-1} e^{\eta_s \Delta + \eta_s^2 / 8} \\ &\leq \exp\left(\Delta \sum_{s=1}^{t-1} \eta_s\right) \exp\left(\frac{1}{8} \sum_{s=1}^{t-1} \eta_s^2\right) \\ &\leq \exp\left(2\alpha\Delta\sqrt{t} + \alpha^2 \log t\right). \end{aligned}$$

Overall, we have shown that for  $t > C$ ,

$$\mathbf{E}[q_t] \leq \exp(-\alpha\sqrt{C} + 2\alpha\Delta\sqrt{t} + \alpha^2 \log t).$$

Whenever  $t \leq t_1 := \min\{2^{-6}C/\Delta^2, \exp(\frac{1}{4}\sqrt{C}/\alpha)\}$ , the right hand side is  $\leq \exp(-\frac{1}{2}\alpha\sqrt{C}) \leq \frac{1}{2}$  for  $\alpha \geq 1/\sqrt{C}$ . Hence, in that case,

$$\mathcal{R}_T \geq \sum_{s=1}^{t_1} \Delta \mathbf{E}[1 - q_s] \geq \sum_{s=1}^{t_1} \frac{1}{2} \Delta \geq \frac{1}{2} \Delta t_1. \quad \blacksquare$$

## B Analysis of OMD in the Purely Stochastic Case

**Proof of Theorem 8.** Applying Theorem 11 for the experts setting we get

$$\mathcal{R}_T \leq \frac{1}{\eta_1} (H(p_1) - H(p^*)) + \sum_{t=1}^{T-1} \left(\frac{1}{\eta_{t+1}} - \frac{1}{\eta_t}\right) \sum_{i=1}^N p_i^* \log \frac{p_i^*}{p_{t+1,i}} + \frac{1}{2} \sum_{t=1}^T \eta_t (\|\ell_t\|_i^*)^2,$$

where we used the fact that the Bregman divergence of the negative entropy is the KL divergence. In addition, using similar observations as in the proof of Lemma 6 (e.g., Eqs. (8) and (9)) and setting  $\eta_t = c/\sqrt{t}$  we obtain

$$\mathcal{R}_T \leq \frac{\log N}{c} + \frac{1}{2c^2} \sum_{t=1}^{T-1} \eta_t \log \frac{1}{p_{t+1,i^*}} + \frac{1}{2} \sum_{t=1}^T \sum_{i=1}^N \eta_t p_{t,i} \ell_{t,i}^2.$$

Applying additive translation we get,

$$\mathcal{R}_T \leq \frac{\log N}{c} + \frac{1}{2c^2} \sum_{t=1}^{T-1} \eta_t \log \frac{1}{p_{t+1,i^*}} + \frac{1}{2} \sum_{t=1}^T \eta_t \sum_{i=1}^N p_{t,i} (\ell_{t,i} - \ell_{t,i^*})^2. \quad (13)$$

Similarly to Lemma 12 we can bound the third term by

$$\frac{1}{2} \sum_{t=1}^T \eta_t \sum_{i=1}^N p_{t,i} (\ell_{t,i} - \ell_{t,i^*})^2 \leq \frac{c^2}{\Delta} + \frac{1}{2} \bar{\mathcal{R}}_T = \frac{\log N}{\Delta} + \frac{1}{2} \bar{\mathcal{R}}_T. \quad (14)$$

We now examine the second term. Using the MW algorithm defined in Eq. (5) we have,

$$\log \frac{1}{p_{t+1,i^*}} = \log \frac{\sum_{i=1}^N e^{-\sum_{s=1}^{t-1} \eta_s \ell_{t,i}}}{e^{-\sum_{s=1}^{t-1} \eta_s \ell_{s,i^*}}} = \log \left( 1 + \sum_{i \neq i^*} e^{-\sum_{s=1}^{t-1} \eta_s (\ell_{s,i} - \ell_{s,i^*})} \right).$$

Plugging it back to the original term we get

$$\frac{1}{2c^2} \sum_{t=1}^{T-1} \eta_t \log \frac{1}{p_{t+1,i^*}} = \frac{1}{2c} \sum_{t=1}^{T-1} \frac{1}{\sqrt{t}} \log \left( 1 + \sum_{i \neq i^*} e^{-\sum_{s=1}^{t-1} \eta_s (\ell_{s,i} - \ell_{s,i^*})} \right).$$

By taking the expectation and using its linearity property we obtain

$$\begin{aligned} \frac{1}{2c} \sum_{t=1}^{T-1} \frac{1}{\sqrt{t}} \mathbf{E} \left[ \log \left( 1 + \sum_{i \neq i^*} e^{-\sum_{s=1}^{t-1} \eta_s (\ell_{t,i} - \ell_{t,i^*})} \right) \right] &\leq \frac{1}{2c} \sum_{t=1}^{T-1} \frac{1}{\sqrt{t}} \log \left( 1 + \sum_{i \neq i^*} \mathbf{E} \left[ e^{-\sum_{s=1}^{t-1} \eta_s (\ell_{s,i} - \ell_{s,i^*})} \right] \right) \\ &\leq \frac{1}{2c} \sum_{t=1}^{T-1} \frac{1}{\sqrt{t}} \log \left( 1 + \sum_{i \neq i^*} \prod_{s=1}^{t-1} \mathbf{E} \left[ e^{-\eta_s (\ell_{s,i} - \ell_{s,i^*})} \right] \right), \end{aligned}$$

where we used Jensen inequality for concave functions for the first inequality and the fact that  $x_t := \ell_{t,i} - \ell_{t,i^*}$  are i.i.d. for the second inequality. Applying Hoeffding's Lemma yields,

$$\frac{1}{2c} \sum_{t=1}^{T-1} \frac{1}{\sqrt{t}} \log \left( 1 + \sum_{i \neq i^*} \prod_{s=1}^{t-1} \mathbf{E} \left[ e^{-\eta_s (\ell_{s,i} - \ell_{s,i^*})} \right] \right) \leq \frac{1}{2c} \sum_{t=1}^{T-1} \frac{1}{\sqrt{t}} \log \left( 1 + N \exp \left( \sum_{s=1}^{t-1} \left( \frac{1}{2} \eta_s^2 - \eta_s \Delta \right) \right) \right).$$

Next, we bound the argument of the exponent

$$\begin{aligned} \sum_{s=1}^{t-1} \left( \frac{1}{2} \eta_s^2 - \eta_s \Delta \right) &\leq \frac{c^2}{2} \sum_{s=1}^{t-1} \frac{1}{s} - c\Delta \sum_{s=1}^{t-1} \frac{1}{\sqrt{s}} \\ &\leq \frac{c^2}{2} (1 + \log t) - c\Delta \sqrt{t} \\ &\leq c^2 \log t - c\Delta \sqrt{t}, \end{aligned}$$

where we bounded the summations by their integrals. Therefore we have

$$\frac{1}{2c} \sum_{t=1}^{T-1} \frac{1}{\sqrt{t}} \log \left( 1 + N e^{\sum_{s=1}^{t-1} \left( \frac{\eta_s^2}{2} - \eta_s \Delta \right)} \right) \leq \frac{1}{2c} \sum_{t=1}^{T-1} \frac{1}{\sqrt{t}} \log \left( 1 + N e^{c^2 \log t - c\Delta \sqrt{t}} \right).$$

First we examine the sum from  $t_1$  onward, while we require that for  $t \geq t_1$  it holds

$$c^2 \log t \leq \frac{1}{2} c\Delta \sqrt{t}. \quad (15)$$

To satisfy Eq. (15) it suffices to take

$$t_1 = \left( \frac{8c}{\Delta} \right)^2 \log^2 \frac{8c}{\Delta}.$$

Therefore,

$$\begin{aligned} \frac{1}{2c} \sum_{t=t_1+1}^{T-1} \frac{1}{\sqrt{t}} \log \left( 1 + N e^{c^2 \log t - 2c\Delta \sqrt{t}} \right) &\leq \frac{1}{2c} \sum_{t=t_1+1}^{T-1} \frac{1}{\sqrt{t}} \log \left( 1 + N e^{-\frac{1}{2} c\Delta \sqrt{t}} \right) \\ &\leq \frac{N}{2c} \sum_{t=t_1+1}^{T-1} \frac{1}{\sqrt{t}} e^{-\frac{1}{2} c\Delta \sqrt{t}} \quad (\log(1+x) \leq x) \\ &\leq \frac{N}{2c} \int_{t_1}^{T-1} \frac{1}{\sqrt{t}} e^{-\frac{1}{2} c\Delta \sqrt{t}} dt \\ &\leq \frac{N}{c^2 \Delta} e^{-\frac{1}{2} c\Delta \sqrt{t_1}} \\ &\leq \frac{2N}{c^2 \Delta} e^{-c^2 \log t_1} \quad (c^2 \log t_1 \leq \frac{1}{2} c\Delta \sqrt{t_1}) \\ &\leq \frac{2}{\Delta \log N}. \quad (t_1 > 1 \text{ and } c = \sqrt{\log N}) \end{aligned}$$

To conclude we examine the bound up to  $t_1$ ,

$$\begin{aligned}
\frac{1}{2c} \sum_{t=1}^{t_1} \frac{1}{\sqrt{t}} \log\left(1 + Ne^{c^2 \log t - 2c\Delta\sqrt{t}}\right) &\leq \frac{1}{2c} \sum_{t=1}^{t_1} \frac{1}{\sqrt{t}} \log\left(2Ne^{c^2 \log t - 2c\Delta\sqrt{t}}\right) \\
&\leq \frac{1}{2c} \sum_{t=1}^{t_1} \frac{1}{\sqrt{t}} \left(\log 2N + c^2 \log t\right) \\
&\leq \frac{\log 2N + c^2 \log t_1}{2c} \sum_{t=1}^{t_1} \frac{1}{\sqrt{t}} \quad (\log t \leq \log t_1) \\
&\leq \frac{\log 2N + c^2 \log t_1}{c} \sqrt{t_1}.
\end{aligned}$$

Since  $c = \sqrt{\log N}$ , for  $t_1 \geq \lceil e^2 \rceil$  we have  $c^2 \log t_1 = \log N \log t_1 \geq \log 2N$ , and also Eq. (15) still holds. This implies

$$\begin{aligned}
\frac{\log 2N + c^2 \log t_1}{c} \sqrt{t_1} &\leq 2c \log t_1 \sqrt{t_1} \\
&\leq 2\Delta t_1 \\
&\leq 128 \frac{\log N}{\Delta} \log^2\left(\frac{8\sqrt{\log N}}{\Delta}\right).
\end{aligned}$$

when we used the fact that  $c \log t_1 \leq \Delta\sqrt{t_1}$  for the last inequality. Adding both results (up to  $t_1$  and from  $t_1$  onward) we obtain,

$$\frac{1}{2c^2} \sum_{t=1}^{T-1} \eta_t \log \frac{1}{p_{t+1,i^*}} \leq 128 \frac{\log N}{\Delta} \log^2\left(\frac{8\sqrt{\log N}}{\Delta}\right) + \frac{2}{\Delta \log N} \quad (16)$$

Finally, plugging Eqs. (14) and (16) into Eq. (13), taking the expectation and rearranging terms we get

$$\mathbb{E}[\overline{\mathcal{R}}_T] \leq \frac{256 \log N}{\Delta} \log^2\left(\frac{8 \log N}{\Delta}\right) + \frac{8 \log N}{\Delta}. \quad \blacksquare$$

## C Analysis of Time-varying Regularization Algorithms

In this section, we assume the setup of online (linear) optimization, with the notation established in Section 4.1. For the proofs below, we recall the notion of a Bregman divergence. For a continuously differentiable and strictly convex function  $F : \mathcal{W} \rightarrow \mathbb{R}$  defined on a closed convex set  $\mathcal{W}$ , the Bregman divergence associated with  $F$  at a point  $w \in \mathcal{W}$  is defined by

$$\forall w' \in \mathcal{W}, \quad D_F(w', w) = F(w') - F(w) - \nabla F(w) \cdot (w' - w).$$

### C.1 Follow the Regularized Leader

First, we present a general analysis for Follow the Regularized Leader, described in Eq. (6), and later establish Theorem 10.

**Theorem 14.** *There exists a sequence of points  $z_t \in [w_t, w_{t+1}]$  such that, for all  $w^* \in \mathcal{W}$ ,*

$$\sum_{t=1}^T g_t \cdot (w_t - w^*) \leq R_{T+1}(w^*) - R_1(w_1) + \sum_{t=1}^T (R_t(w_{t+1}) - R_{t+1}(w_{t+1})) + \frac{1}{2} \sum_{t=1}^T (\|g_t\|_t^*)^2.$$

Here  $\|w\|_t = \sqrt{w^\top \nabla^2 R_t(z_t) w}$  is the local norm induced by  $R_t$  at  $z_t$ , and  $\|\cdot\|_t^*$  is its dual.

**Proof.** Denote  $\Phi_t(w) = w \cdot \sum_{s=1}^{t-1} g_s + R_t(w)$ , so that  $w_t = \operatorname{argmin}_{w \in \mathcal{W}} \Phi_t(w)$ . We first write

$$\begin{aligned}
\sum_{t=1}^T g_t \cdot w_{t+1} &= \sum_{t=1}^T (\Phi_{t+1}(w_{t+1}) - \Phi_t(w_{t+1})) + \sum_{t=1}^T (R_t(w_{t+1}) - R_{t+1}(w_{t+1})) \\
&= \Phi_{T+1}(w_{T+1}) - \Phi_1(w_1) + \sum_{t=1}^T (\Phi_t(w_t) - \Phi_t(w_{t+1})) + \sum_{t=1}^T (R_t(w_{t+1}) - R_{t+1}(w_{t+1})).
\end{aligned}$$

Since  $w_t$  is the minimizer of  $\Phi_t$  over  $\mathcal{W}$ , first-order optimality conditions imply  $\Phi_t(w_t) - \Phi_t(w_{t+1}) = -\nabla\Phi_t(w_t) \cdot (w_{t+1} - w_t) - D_{\Phi_t}(w_{t+1}, w_t) \leq -D_{\Phi_t}(w_{t+1}, w_t) = -D_{R_t}(w_{t+1}, w_t)$ , where we have used the fact that the Bregman divergence is invariant to linear terms. On the other hand, since  $w_{T+1}$  is the minimizer of  $\Phi_{T+1}$ , we have that

$$\sum_{t=1}^T g_t \cdot w^* = \Phi_{T+1}(w^*) - R_{T+1}(w^*) \geq \Phi_{T+1}(w_{T+1}) - R_{T+1}(w^*).$$

Combining inequalities and observing that  $\Phi_1(w_1) = R_1(w_1)$ , we obtain

$$\sum_{t=1}^T g_t \cdot (w_{t+1} - w^*) \leq R_{T+1}(w^*) - R_1(w_1) + \sum_{t=1}^T (R_t(w_{t+1}) - R_{t+1}(w_{t+1})) - \sum_{t=1}^T D_{R_t}(w_{t+1}, w_t).$$

On the other hand, a Taylor expansion of  $R_t(\cdot)$  around  $w_t$  with an explicit second-order remainder term implies that, for some intermediate point  $z_t \in [w_t, w_{t+1}]$ , it holds that

$$D_{R_t}(w_{t+1}, w_t) = \frac{1}{2}(w_{t+1} - w_t)^\top \nabla^2 R_t(z_t) (w_{t+1} - w_t) = \frac{1}{2} \|w_{t+1} - w_t\|_t^2.$$

An application of Holder's inequality then gives

$$g_t \cdot (w_t - w_{t+1}) \leq \|g_t\|_t^* \|w_t - w_{t+1}\|_t \leq \frac{1}{2} (\|g_t\|_t^*)^2 + \frac{1}{2} \|w_t - w_{t+1}\|_t^2 = \frac{1}{2} (\|g_t\|_t^*)^2 + D_{R_t}(w_{t+1}, w_t).$$

The proof is finalized by summing over  $t = 1, \dots, T$  and adding to the inequality above.  $\blacksquare$

**Proof of Theorem 10.** Fix any  $w^* \in \mathcal{W}$ . Observe that FTRL with regularizations  $R_t(w) = \eta_t^{-1} R(w)$  is equivalent to FTRL with  $R_t(w) = \eta_t^{-1} (R(w) - R(w^*))$ . Applying Theorem 14 for the latter and rearranging, we obtain the claimed bound.  $\blacksquare$

## C.2 Online Mirror Descent

We next consider Online Mirror Descent (see Eq. (7)), and prove the following general bound from which Theorem 11 directly follows.

**Lemma 15.** *There exist points  $z_t \in [w_t, w'_{t+1}]$  such that for all  $w^* \in \mathcal{W}$ ,*

$$\sum_{t=1}^T g_t \cdot (w_t - w^*) \leq R_1(w^*) - R_1(w_1) + \sum_{t=1}^{T-1} (D_{R_{t+1}}(w^*, w_{t+1}) - D_{R_t}(w^*, w_{t+1})) + \frac{1}{2} \sum_{t=1}^T (\|g_t\|_t^*)^2.$$

Here  $\|w\|_t = \sqrt{w^\top \nabla^2 R_t(z_t) w}$  is the local norm induced by  $R_t$  at  $z_t$ , and  $\|\cdot\|_t^*$  is its dual.

**Proof.** Fix any  $w^* \in \mathcal{W}$ . We will bound each of the terms  $g_t \cdot (w_t - w^*)$ . First, from the update rule of Mirror Descent and the three-point property of the Bregman divergence, we have

$$\begin{aligned} g_t \cdot (w'_{t+1} - w^*) &= (\nabla R(w_t) - \nabla R(w'_{t+1})) \cdot (w'_{t+1} - w^*) \\ &= D_{R_t}(w^*, w_t) - D_{R_t}(w^*, w'_{t+1}) - D_{R_t}(w'_{t+1}, w_t). \end{aligned}$$

Now, a Taylor expansion of  $R_t$  at  $x_t$  (with an explicit Lagrange remainder term) shows that there exists  $z_t \in [w_t, w_{t+1}]$  for which

$$D_{R_t}(w'_{t+1}, w_t) = \frac{1}{2}(w'_{t+1} - w_t)^\top \nabla^2 R_t(z_t) (w'_{t+1} - w_t) = \frac{1}{2} \|w'_{t+1} - w_t\|_t^2.$$

Also, since  $w_{t+1}$  is the projection (with respect to the Bregman divergence  $R_t$ ) of the point  $w'_{t+1}$  onto the set  $\mathcal{W}$  that contains  $w^*$ , it holds that  $D_{R_t}(w^*, w_{t+1}) \leq D_{R_t}(w^*, w'_{t+1})$ . Putting things together, we obtain

$$g_t \cdot (w'_{t+1} - w^*) \leq D_{R_t}(w^*, w_t) - D_{R_t}(w^*, w_{t+1}) - \frac{1}{2} \|w'_{t+1} - w_t\|_t^2. \quad (17)$$

On the other hand, Hölder's inequality and the fact that  $ab \leq \frac{1}{2}(a^2 + b^2)$  yield

$$g_t \cdot (w_t - w'_{t+1}) \leq \|g_t\|_t^* \cdot \|w_t - w'_{t+1}\|_t \leq \frac{1}{2} (\|g_t\|_t^*)^2 + \frac{1}{2} \|w_t - w'_{t+1}\|_t^2. \quad (18)$$

Summing Eqs. (17) and (18) together over  $t = 1, \dots, T$  gives the regret bound

$$\sum_{t=1}^T g_t \cdot (w_t - w^*) \leq \sum_{t=1}^T (D_{R_t}(w^*, w_t) - D_{R_t}(w^*, w_{t+1})) + \frac{1}{2} \sum_{t=1}^T (\|g_t\|_t^*)^2.$$

Rearranging the first summation and using the facts that  $D_{R_T}(w^*, w_{T+1}) \geq 0$  and  $D_{R_1}(w^*, w_1) \leq R_1(w^*) - R_1(w_1)$  (the latter follows since  $w_1$  is the minimizer of  $R_1$ , and so  $\nabla R_1(w_1) \cdot (w^* - w_1) \geq 0$ ) gives the stated regret bound.  $\blacksquare$
